# Supplementary material
Source: PubMed Central journal article supplement (PMC4790701)

## **Appendix 2: Supplementary figures [posted as supplied by author]**

### **WEB APPENDIX FIGURE LEGEND**

**Figure A1.** Stent type and risk of target vessel revascularization in trial with clopidogrel duration of at least 6 months. The numbers represents rate ratio (RR) and 95% credibility intervals (CrI). BMS= Bare Metal Stent; Ref= Reference.

**Figure A2.** Stent type and risk of target lesion revascularization in trial with clopidogrel duration of at least 6 months. The numbers represents rate ratio (RR) and 95% credibility intervals (CrI). BMS= Bare Metal Stent; Ref= Reference.

**Figure A3.** Stent type and risk of death in trial with clopidogrel duration of at least 6 months. The numbers represents rate ratio (RR) and 95% credibility intervals (CrI). BMS= Bare Metal Stent; Ref= Reference.

**Figure A4.** Stent type and risk of myocardial infarction in trial with clopidogrel duration of at least 6 months. The numbers represents rate ratio (RR) and 95% credibility intervals (CrI). BMS= Bare Metal Stent; Ref= Reference.

**Figure A5.** Stent type and risk of any stent thrombosis in trial with clopidogrel duration of at least 6 months. The numbers represents rate ratio (RR) and 95% credibility intervals (CrI). BMS= Bare Metal Stent; Ref= Reference.

**Figure A6.** Stent type and risk of ARC defined definite or probable stent thrombosis in trial with clopidogrel duration of at least 6 months. The numbers represents rate ratio (RR) and 95% credibility intervals (CrI). BMS= Bare Metal Stent; Ref= Reference.

**Figure A7.** Stent type and risk of ARC defined definite stent thrombosis in trial with clopidogrel duration of at least 6 months. The numbers represents rate ratio (RR) and 95% credibility intervals (CrI). BMS= Bare Metal Stent; Ref= Reference.

**Figure A8.** Stent type and risk of target vessel revascularization in a sensitivity analysis including the Zotarolimus-Resolute trials (target vessel/lesion failure substituted for TVR for the Resolute trials). The numbers represents rate ratio (RR) and 95% credibility intervals (CrI). BMS= Bare Metal Stent; Ref= Reference.

**Figure B1.** Q-Q plot for the network of all trials for the outcome of target vessel revascularization.

**Figure B2.** Q-Q plot for the network of all trials for the outcome of target lesion revascularization.

**Figure B3.** Q-Q plot for the network of all trials for the outcome of death.

**Figure B4.** Q-Q plot for the network of all trials for the outcome of myocardial infarction.

**Figure B5.** Q-Q plot for the network of all trials for the outcome of any stent thrombosis.

**Figure B6.** Q-Q plot for the network of all trials for the outcome of ARC defined definite or probable stent thrombosis.

**Figure B7.** Q-Q plot for the network of all trials for the outcome of ARC defined definite stent thrombosis.

**Figure A1**

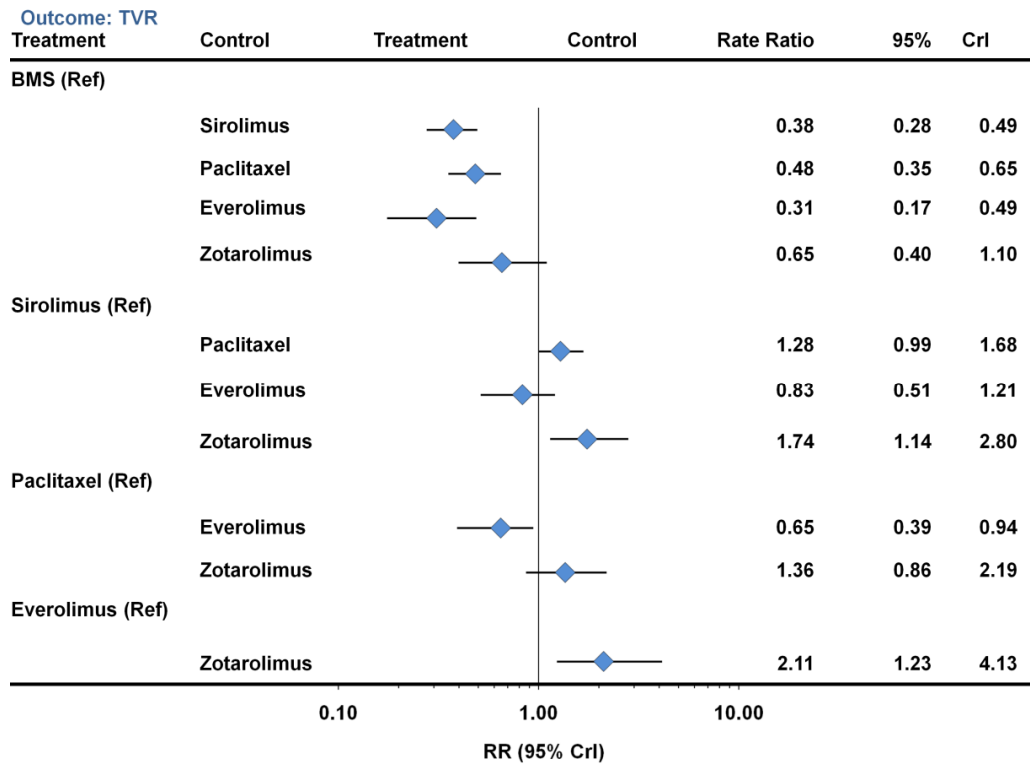

**Figure A2**

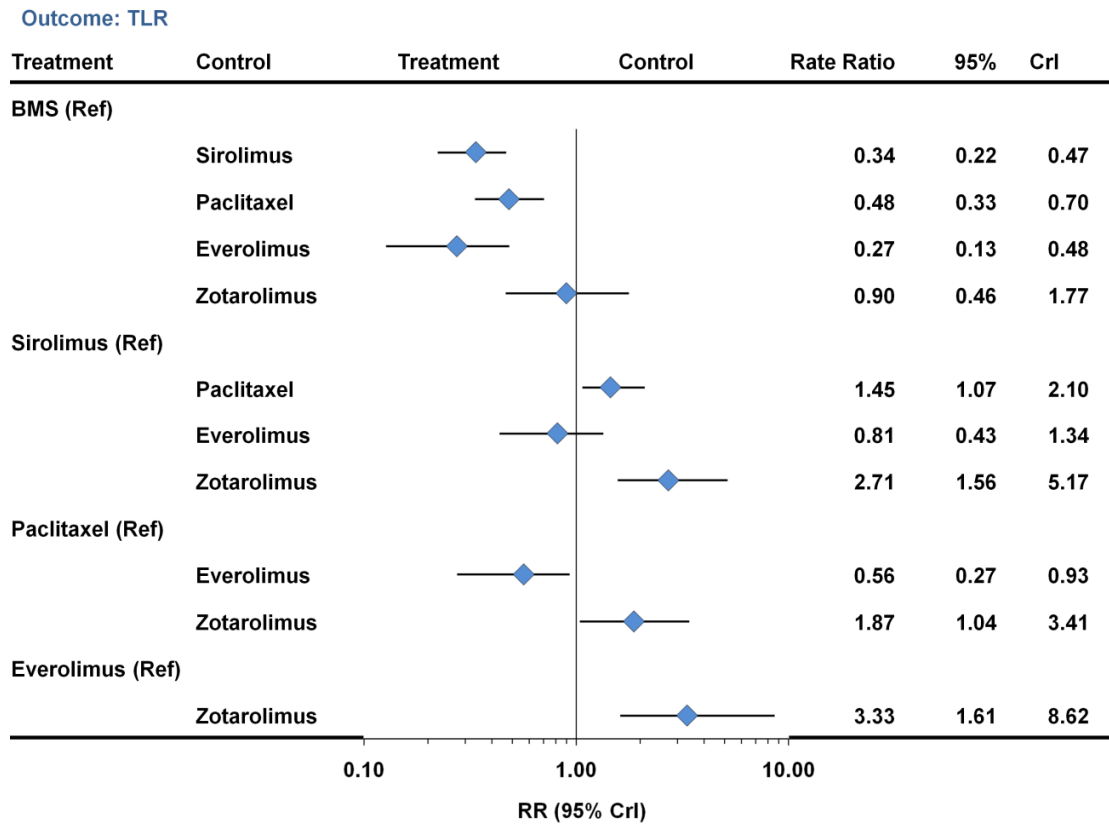

**Figure A3**

Outcome: Death

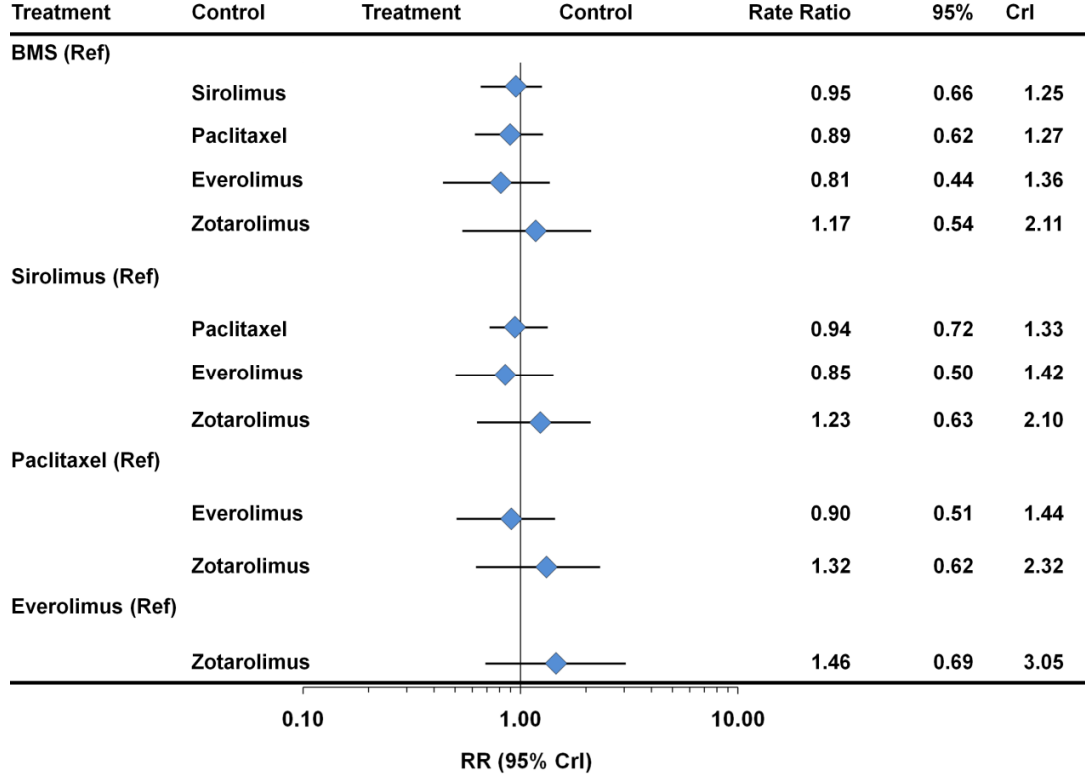

**Figure A4**

Outcome: MI

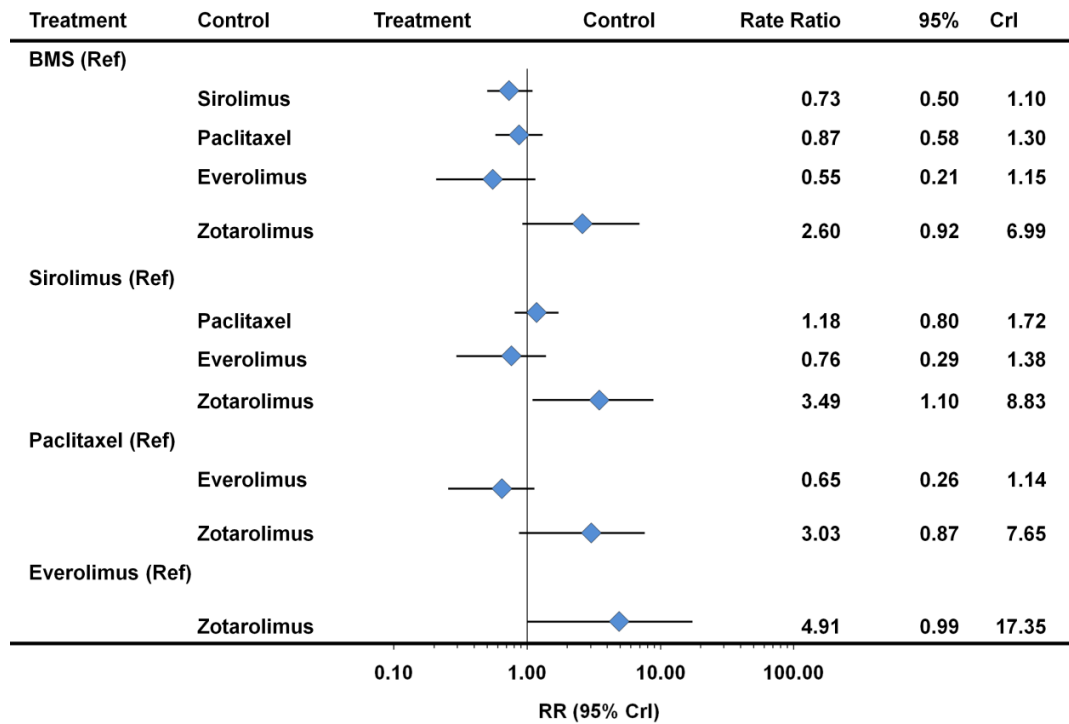

**Figure A5**

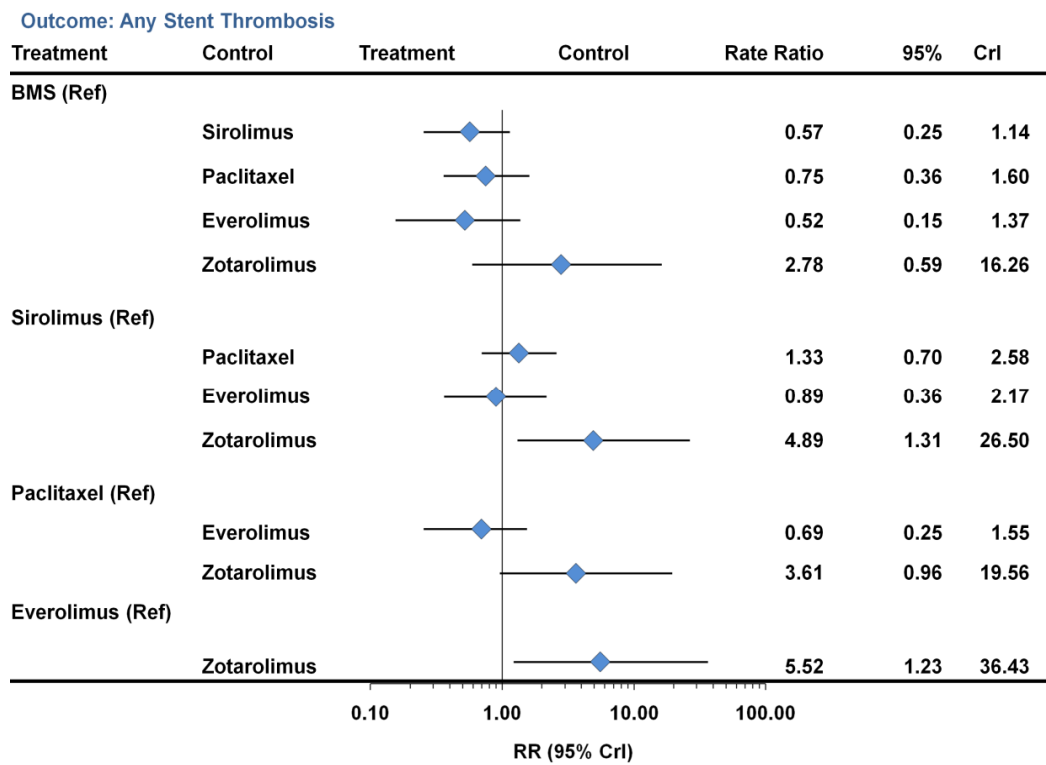

**Figure A6**

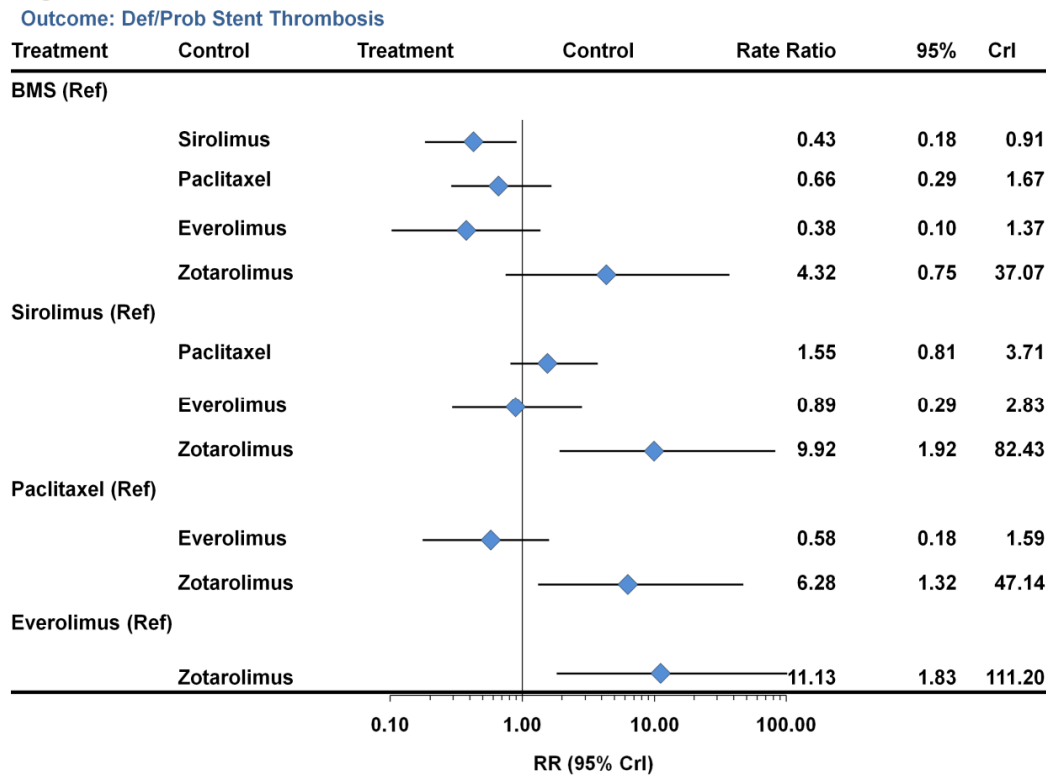

**Figure A7.**

Outcome: Def Stent Thrombosis

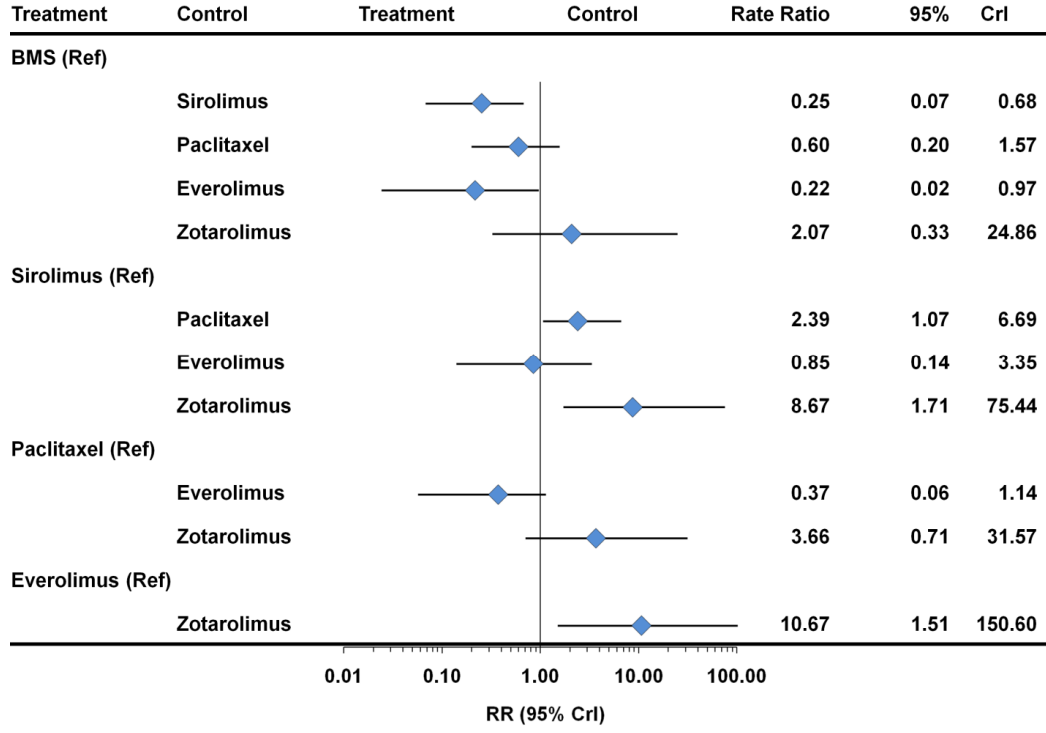

**Figure A8.**

Outcome: TVR

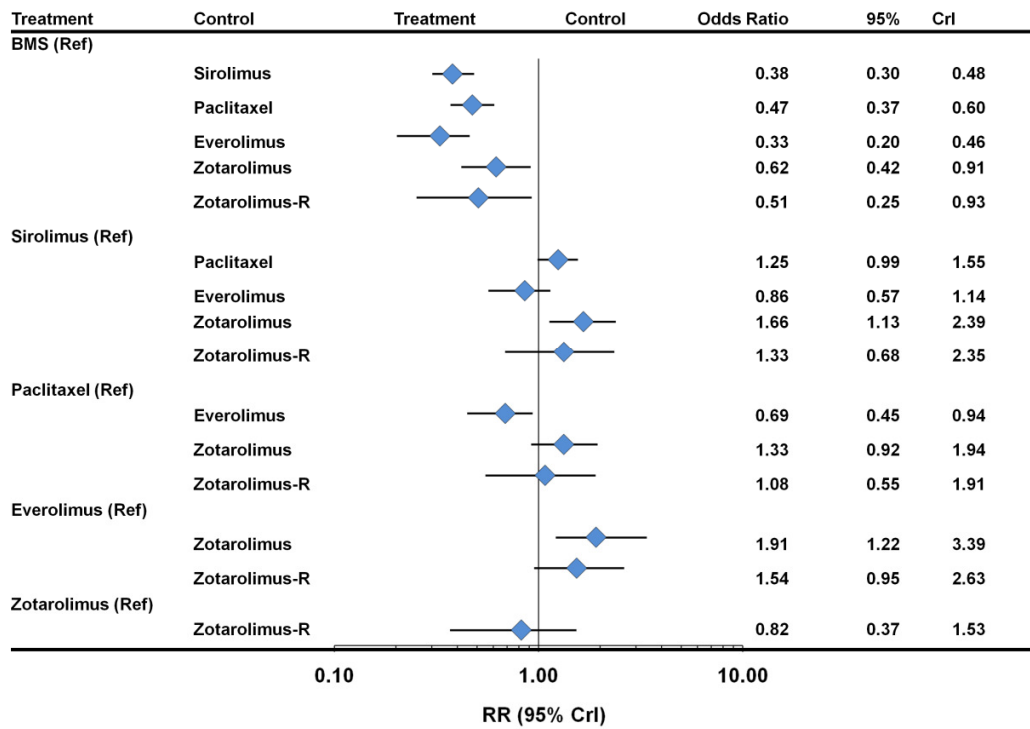

Figure B1.

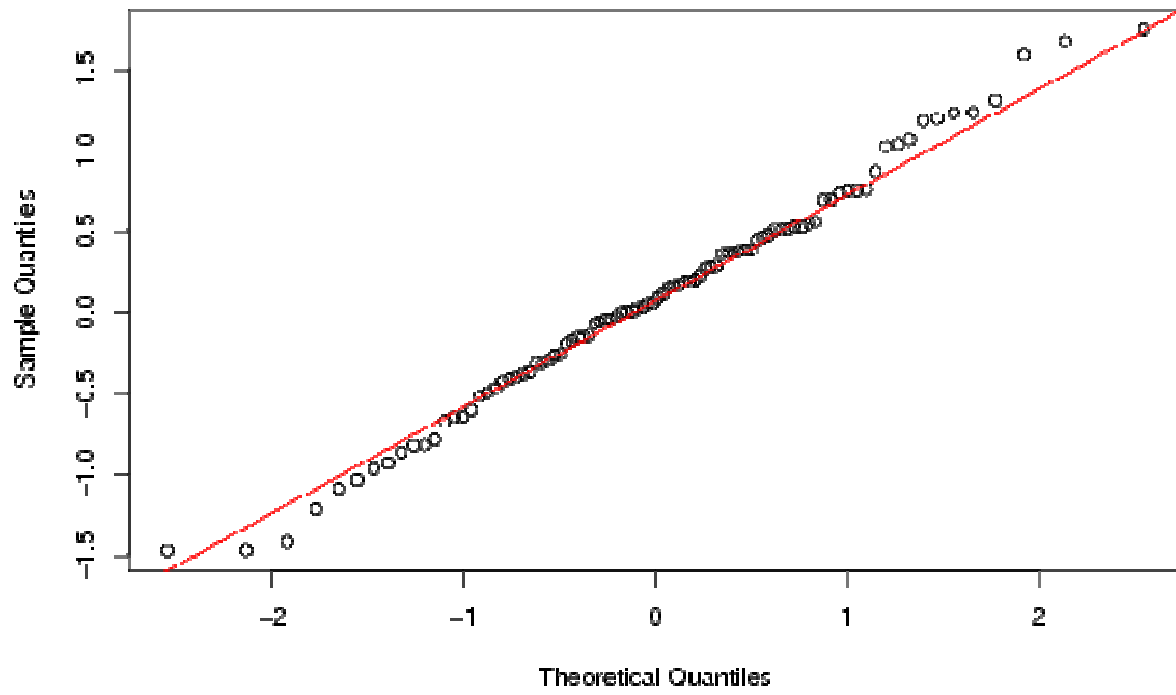

Figure B2.

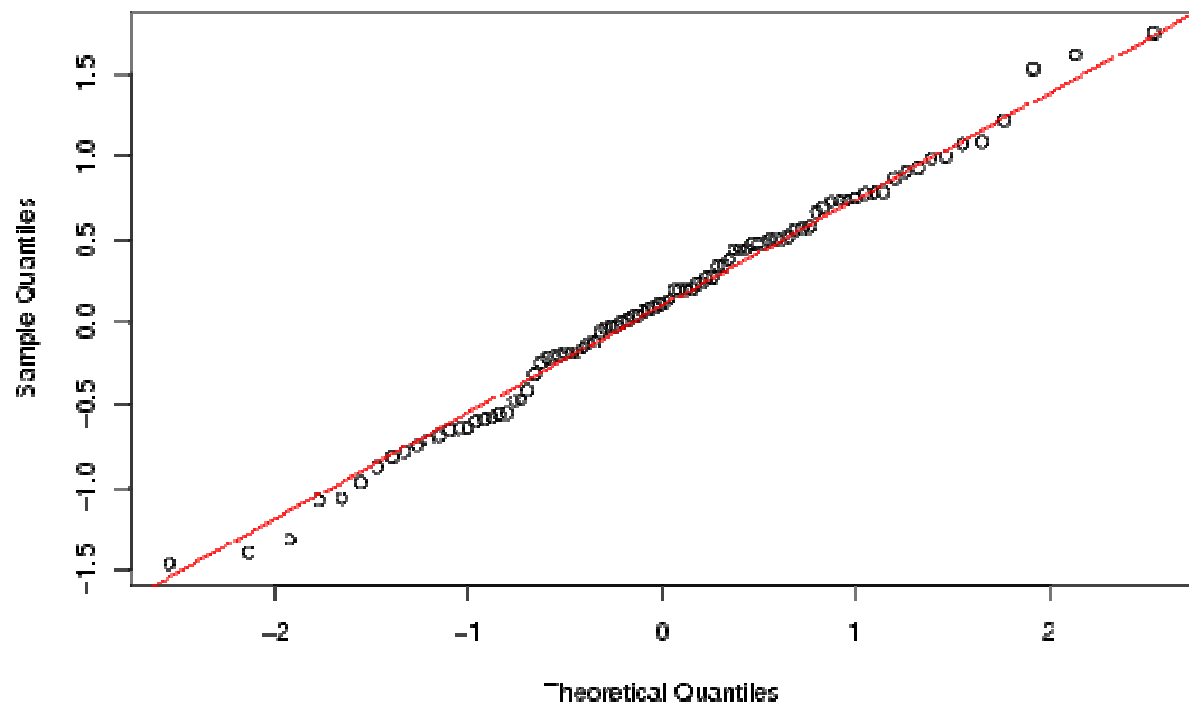

Figure B3.

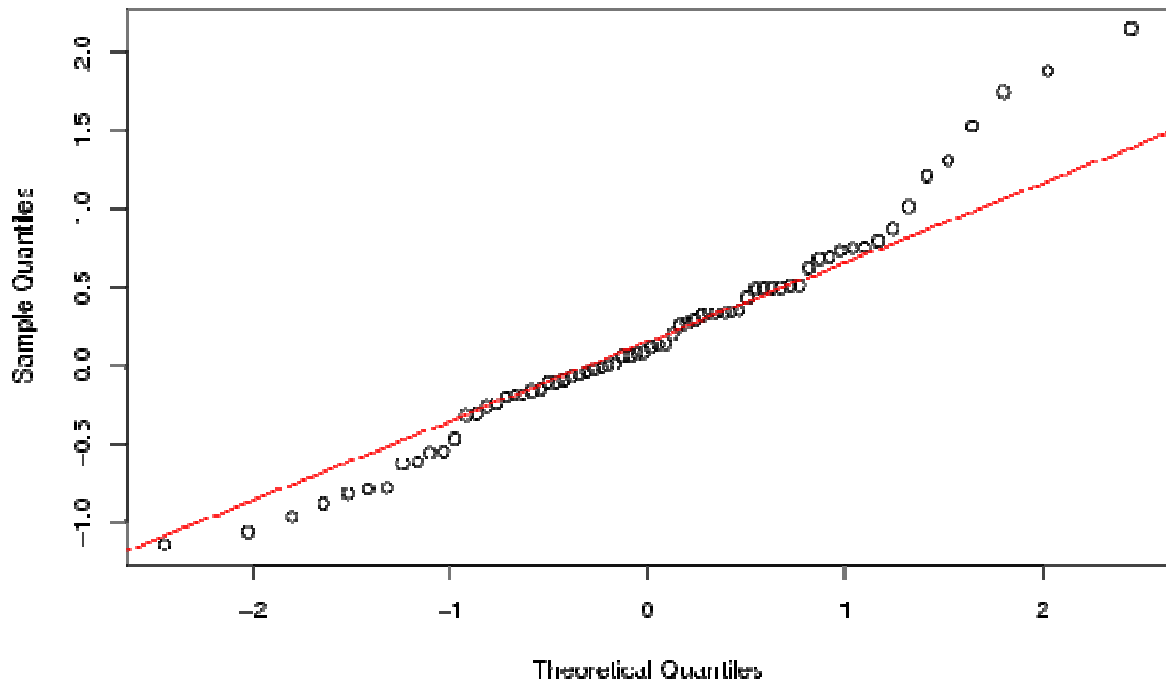

Figure B4.

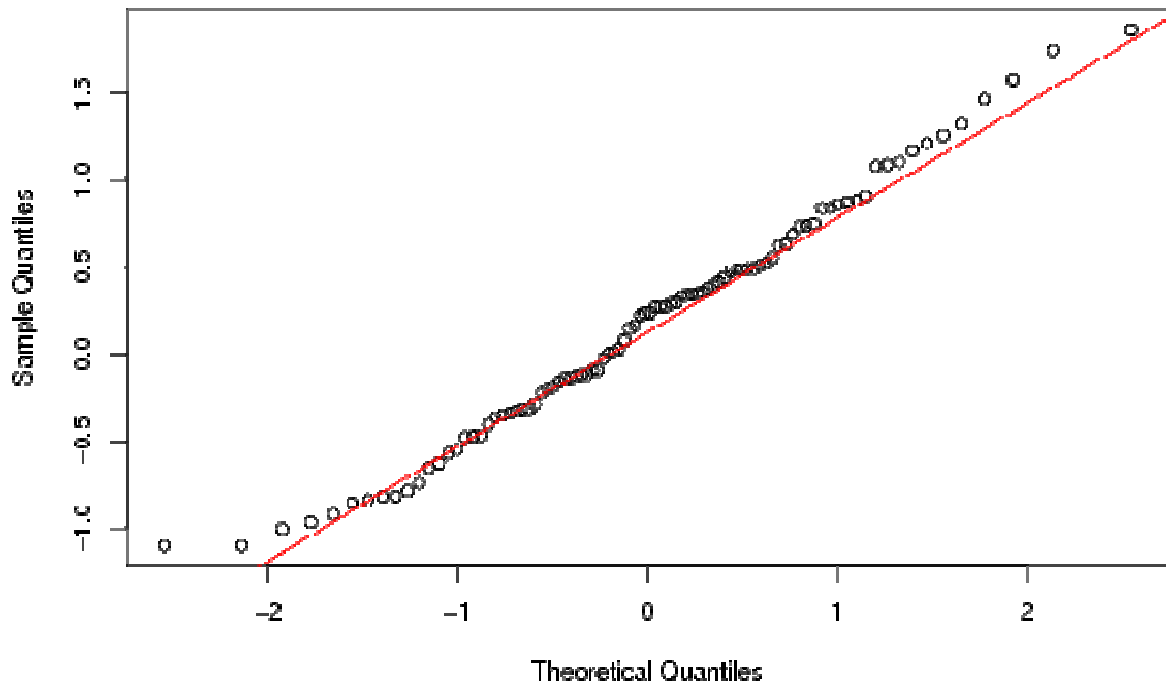



Figure B5.

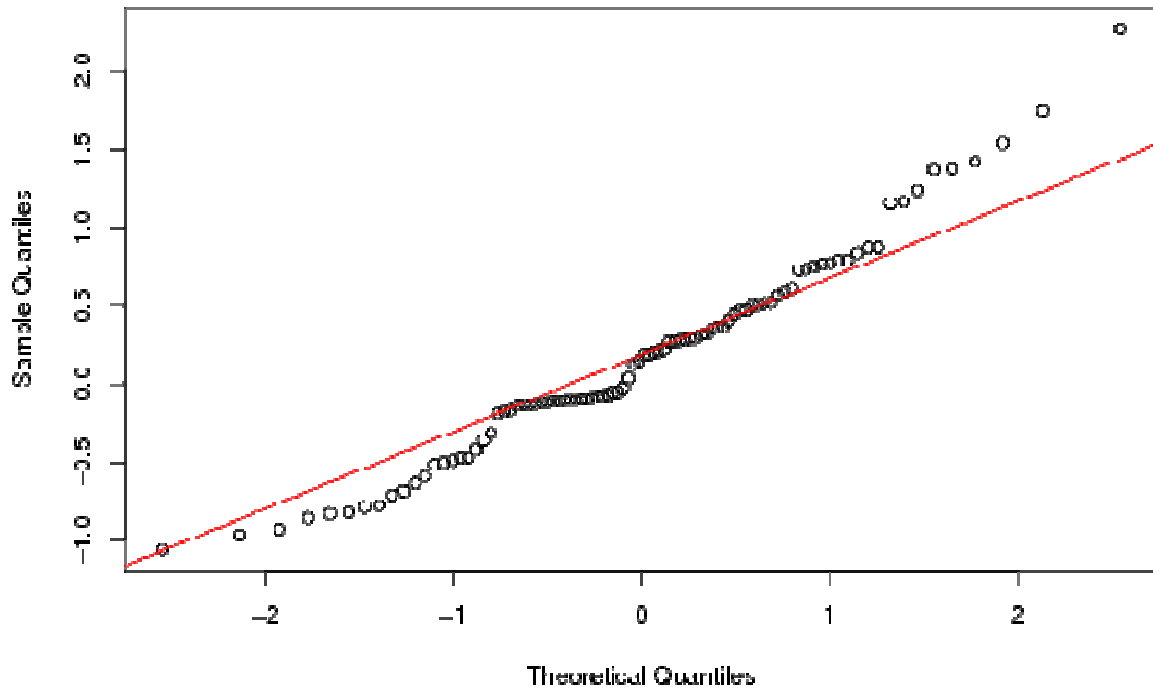

Figure B6.

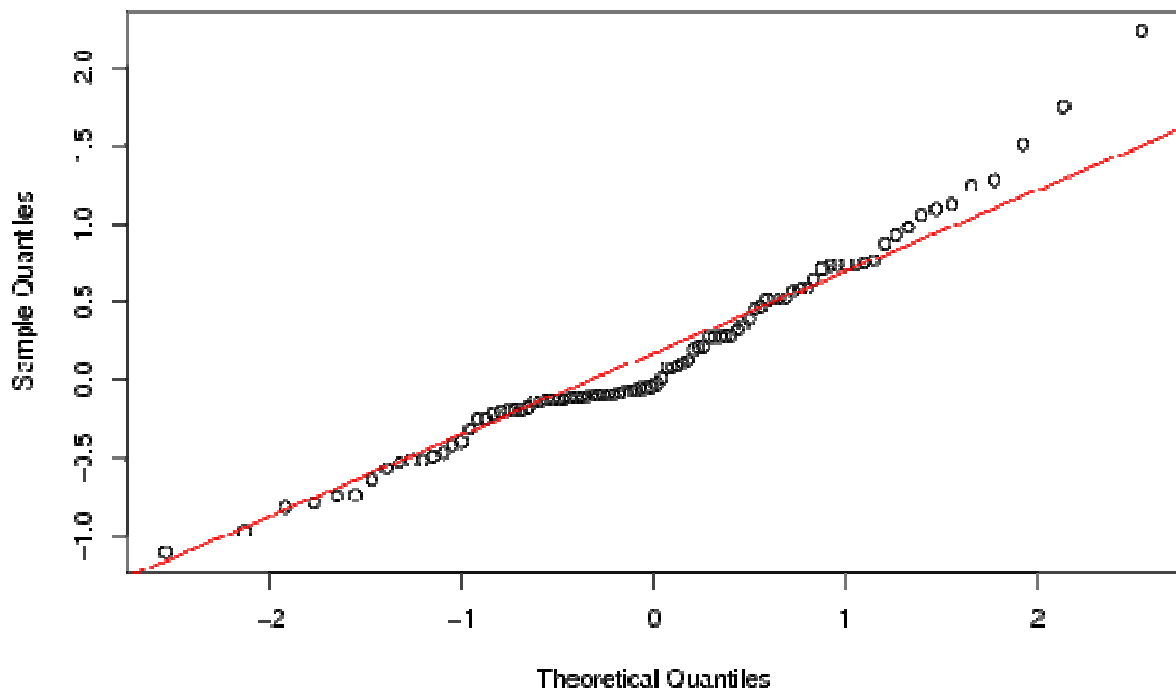

Figure B7.

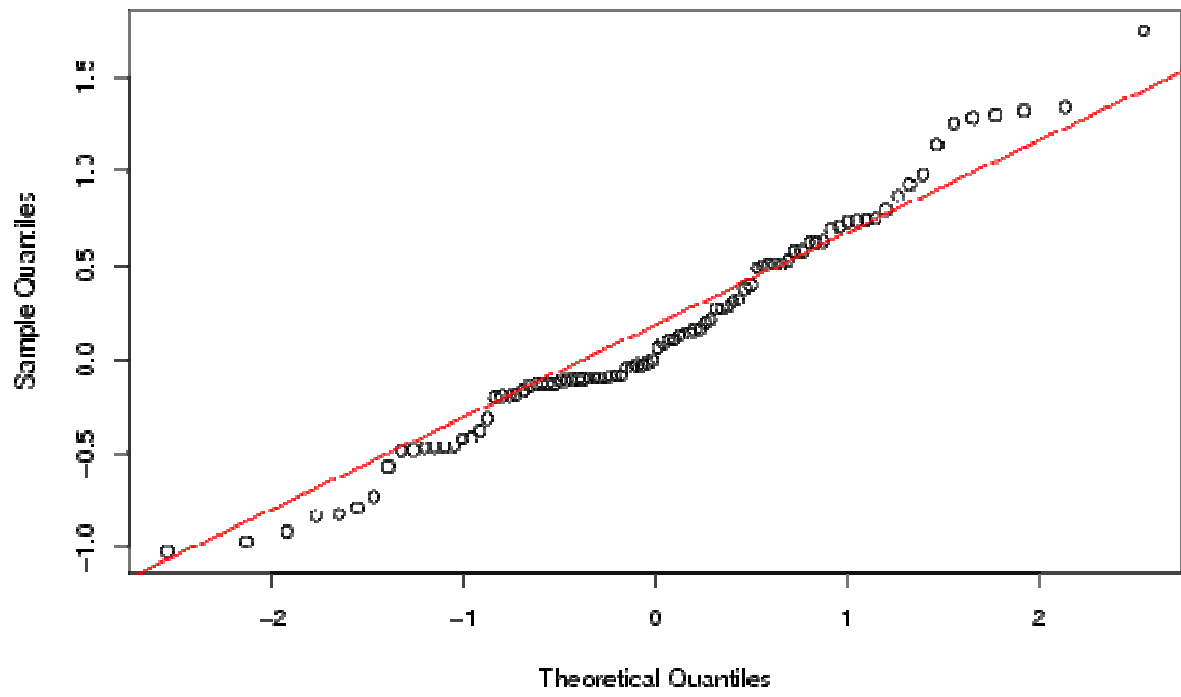

Supplement: bans004157.ww2_default.pdf [file bans004157.ww2_default.pdf]
