# Supplementary material
Source: PubMed Central journal article supplement (PMC4790701)
Supplement: bans004157.ww1_default.pdf [file bans004157.ww1_default.pdf]

**Appendix 1: Supplementary tables [posted as supplied by author]**

**Table A.** Details of MeSH Search Terms

| <b>Stent</b>       | <b>MeSH terms</b>                                                                                                                               |
|--------------------|-------------------------------------------------------------------------------------------------------------------------------------------------|
| Bare Metal Stent   | Randomized controlled trial, clinical trial, Human, Diabetes, Bare metal stent, Vision, Bx velocity, Millenium, Multilink vision                |
| Drug Eluting Stent | Randomized controlled trial, clinical trial, Human, Diabetes, Drug eluting stent, Eluting stent, Paclitaxel, Sirolimus, Everolimus, Zotarolimus |

**Appendix Table B.** Sensitivity Analysis: Select Outcomes in Trials with Low-bias Risk

| Reference  | Comparator  | TVR               | Death             | MI                 | Any ST             |
|------------|-------------|-------------------|-------------------|--------------------|--------------------|
|            |             | RR (95% Cr I)     | RR (95% Cr I)     | RR (95% Cr I)      | RR (95% Cr I)      |
| Bare Metal | Sirolimus   | 0.37 (0.28, 0.46) | 0.99 (0.72, 1.36) | 0.75 (0.51, 1.03)  | 0.67 (0.34, 1.35)  |
|            | Paclitaxel  | 0.47 (0.35, 0.62) | 1.01 (0.67, 1.44) | 0.80 (0.52, 1.14)  | 0.83 (0.37, 1.69)  |
|            | Everolimus  | 0.30 (0.18, 0.45) | 0.88 (0.42, 1.56) | 0.49 (0.20, 0.94)  | 0.58 (0.18, 1.62)  |
|            | Zotarolimus | 0.60 (0.40, 0.93) | 1.20 (0.62, 2.26) | 2.52 (0.92, 7.01)  | 3.61 (0.81, 19.51) |
| Sirolimus  | Paclitaxel  | 1.26 (1.00, 1.68) | 1.01 (0.70, 1.39) | 1.08 (0.72, 1.53)  | 1.19 (0.63, 2.43)  |
|            | Everolimus  | 0.81 (0.54, 1.17) | 0.88 (0.45, 1.56) | 0.64 (0.28, 1.24)  | 0.85 (0.32, 2.21)  |
|            | Zotarolimus | 1.61 (1.12, 2.47) | 1.22 (0.65, 2.16) | 3.33 (1.30, 8.41)  | 5.35 (1.40, 31.05) |
| Paclitaxel | Everolimus  | 0.63 (0.41, 0.91) | 0.87 (0.44, 1.44) | 0.61 (0.28, 1.12)  | 0.71 (0.26, 1.70)  |
|            | Zotarolimus | 1.28 (0.85, 1.94) | 1.18 (0.62, 2.34) | 3.12 (1.19, 8.01)  | 4.32 (1.18, 23.58) |
| Everolimus | Zotarolimus | 2.00 (1.24, 3.61) | 1.37 (0.64, 3.34) | 5.28 (1.68, 15.84) | 6.16 (1.29, 40.22) |

Cr I = credibility interval; MI = myocardial infarction; ST = stent thrombosis; TVR= target vessel revascularization

**Appendix Table C. Sensitivity Analysis: Select Outcomes in Non-ACS Trials**

| Reference  | Comparator  | TVR               | Death             | MI                  | Any ST               |
|------------|-------------|-------------------|-------------------|---------------------|----------------------|
|            |             | RR (95% Cr I)     | RR (95% Cr I)     | RR (95% Cr I)       | RR (95% Cr I)        |
| Bare Metal | Sirolimus   | 0.33 (0.22, 0.46) | 0.94 (0.60, 1.45) | 0.64 (0.38, 1.02)   | 0.61 (0.16, 1.84)    |
|            | Paclitaxel  | 0.41 (0.27, 0.57) | 0.92 (0.57, 1.43) | 0.69 (0.40, 1.13)   | 0.87 (0.25, 3.01)    |
|            | Everolimus  | 0.26 (0.14, 0.43) | 0.79 (0.35, 1.66) | 0.42 (0.13, 0.90)   | 0.54 (0.10, 2.59)    |
|            | Zotarolimus | 0.71 (0.38, 1.28) | 1.27 (0.53, 2.97) | 5.52 (1.08, 74.24)  | 7.41 (0.53, 130.50)  |
| Sirolimus  | Paclitaxel  | 1.21 (0.91, 1.63) | 0.98 (0.66, 1.40) | 1.07 (0.69, 1.65)   | 1.41 (0.69, 3.81)    |
|            | Everolimus  | 0.79 (0.48, 1.19) | 0.84 (0.42, 1.55) | 0.65 (0.23, 1.29)   | 0.86 (0.27, 3.18)    |
|            | Zotarolimus | 2.12 (1.20, 3.85) | 1.35 (0.61, 2.93) | 8.44 (1.93, 126.7)  | 11.36 (1.53, 171.30) |
| Paclitaxel | Everolimus  | 0.65 (0.38, 0.98) | 0.86 (0.44, 1.56) | 0.61 (0.22, 1.14)   | 0.62 (0.16, 2.02)    |
|            | Zotarolimus | 1.74 (0.95, 3.16) | 1.39 (0.57, 3.04) | 8.04 (1.71, 106.3)  | 7.99 (0.91, 120.1)   |
| Everolimus | Zotarolimus | 2.67 (1.37, 5.76) | 1.60 (0.58, 4.33) | 13.52 (2.58, 240.5) | 12.80 (1.29, 256.00) |

ACS = acute coronary syndromes; Cr I = credibility interval; MI = myocardial infarction; ST = stent thrombosis; TVR= target vessel revascularization

**Appendix Table D.** Direct comparison analysis for select outcomes (Random effects model)

| Treatment   | Control    | TVR               | Death             | MI                 | Any ST             | Def/Prob ST        |
|-------------|------------|-------------------|-------------------|--------------------|--------------------|--------------------|
|             |            | RR (95% CI)       | RR (95% CI)       | RR (95% CI)        | RR (95% CI)        | RR (95% CI)        |
| Sirolimus   | Bare Metal | 0.41 (0.31, 0.54) | 1.09 (0.78, 1.51) | 0.79 (0.54, 1.15)  | 0.79 (0.41, 1.53)  | 0.80 (0.32, 2.02)  |
| Paclitaxel  | Bare Metal | 0.55 (0.41, 0.73) | 0.91 (0.60, 1.37) | 0.78 (0.51, 1.20)  | 0.75 (0.33, 1.69)  | 0.69 (0.24, 1.94)  |
| Everolimus  | Bare Metal | -                 | -                 | -                  | -                  | -                  |
| Zotarolimus | Bare Metal | 0.50 (0.23, 1.06) | -                 | -                  | -                  | -                  |
| Paclitaxel  | Sirolimus  | 1.15 (0.87, 1.52) | 1.05 (0.78, 1.42) | 1.28 (0.85, 1.93)  | 1.22 (0.64, 2.30)  | 1.08 (0.24, 4.90)  |
| Everolimus  | Sirolimus  | 0.70 (0.47, 1.04) | 0.43 (0.20, 0.94) | 0.16 (0.03, 0.90)  | 0.67 (0.24, 1.88)  | 0.51 (0.13, 2.09)  |
| Zotarolimus | Sirolimus  | 2.01 (0.97, 4.14) | 1.28 (0.74, 2.22) | 3.35 (0.88, 12.67) | 2.71 (0.60, 12.21) | 1.02 (0.06, 16.26) |
| Everolimus  | Paclitaxel | 0.86 (0.63, 1.17) | 1.36 (0.80, 2.31) | 0.86 (0.55, 1.34)  | 0.79 (0.39, 1.61)  | 0.79 (0.39, 1.61)  |
| Zotarolimus | Paclitaxel | 1.08 (0.67, 1.75) | 0.81 (0.15, 4.40) | 1.84 (0.43, 7.89)  | 4.06 (0.68, 24.43) | 2.94 (0.31, 28.04) |
| Zotarolimus | Everolimus | -                 | -                 | -                  | -                  | -                  |

CI = confidence interval; MI = myocardial infarction; ST = stent thrombosis; TVR= target vessel revascularization

**Appendix Table E.** Between trial heterogeneity: Estimates of the between-trial variance  $\tau^2$

| <b>Outcome</b>                        | <b><math>\tau^2</math> (Overall Model)</b> | <b><math>\tau^2</math> (Model Restricted to Low-Bias Risk Trials)</b> | <b><math>\tau^2</math> (Model Restricted to Trials with Clopidogrel &gt;6 m)</b> |
|---------------------------------------|--------------------------------------------|-----------------------------------------------------------------------|----------------------------------------------------------------------------------|
| Target Vessel Revascularization       | 0.03                                       | 0.03                                                                  | 0.05                                                                             |
| Target Lesion Revascularization       | 0.08                                       | 0.11                                                                  | 0.13                                                                             |
| Death                                 | 0.03                                       | 0.04                                                                  | 0.01                                                                             |
| Myocardial Infarction                 | 0.04                                       | 0.03                                                                  | 0.04                                                                             |
| Any Stent Thrombosis                  | 0.06                                       | 0.12                                                                  | 0.09                                                                             |
| Definite Stent Thrombosis             | 0.19                                       | 0.39                                                                  | 0.21                                                                             |
| Definite or Probable Stent Thrombosis | 0.11                                       | 0.12                                                                  | 0.19                                                                             |

A  $\tau^2$  estimate of 0.04 is interpreted as a low, 0.14 as a moderate and 0.40 as a high degree of heterogeneity between trials.

**Appendix Table F.** Evaluation of model fit: Network of all trials

| <b>Outcome</b>                        | <b>N of Data Points</b> | <b>Mean of residual deviance</b> | <b>N (%) of residuals within <math>\pm 1.96</math> of SND</b> | <b>Satisfactory Q-Q plot</b> |
|---------------------------------------|-------------------------|----------------------------------|---------------------------------------------------------------|------------------------------|
| Target Vessel Revascularization       | 76                      | 86                               | 76 (100%)                                                     | Yes                          |
| Target Lesion Revascularization       | 76                      | 87                               | 76 (100%)                                                     | Yes                          |
| Death                                 | 70                      | 66                               | 69 (98.6%)                                                    | Yes                          |
| Myocardial Infarction                 | 72                      | 73                               | 72 (100%)                                                     | Yes                          |
| Any Stent Thrombosis                  | 72                      | 58                               | 71 (98.6%)                                                    | Yes                          |
| Definite Stent Thrombosis             | 66                      | 48                               | 65 (98.5%)                                                    | Yes                          |
| Definite or Probable Stent Thrombosis | 76                      | 54                               | 76 (100%)                                                     | Yes                          |

The model was considered to provide an adequate fit to the data if (i) the mean of the residual deviance was similar to the number of data points used in the model, (ii) at least 95% of means of standardized nodebased residuals were within  $\pm 1.96$  of the standard normal distribution, and (iii) Q-Q plots of residuals lied closely around a line on visual inspection. SND, Standard Normal Distribution

**Appendix Table G.** Evaluation of model fit: Model restricted to trials with low bias risk

| <b>Outcome</b>                        | <b>N of Data Points</b> | <b>Mean of residual deviance</b> | <b>N (%) of residuals within <math>\pm 1.96</math> of SND</b> | <b>Satisfactory Q-Q plot</b> |
|---------------------------------------|-------------------------|----------------------------------|---------------------------------------------------------------|------------------------------|
| Target Vessel Revascularization       | 66                      | 77                               | 66 (100%)                                                     | Yes                          |
| Target Lesion Revascularization       | 66                      | 76                               | 66 (100%)                                                     | Yes                          |
| Death                                 | 68                      | 61                               | 67 (98.5%)                                                    | Yes                          |
| Myocardial Infarction                 | 62                      | 61                               | 62 (100%)                                                     | Yes                          |
| Any Stent Thrombosis                  | 64                      | 51                               | 63 (98.4%)                                                    | Yes                          |
| Definite Stent Thrombosis             | 58                      | 41                               | 57 (98.3%)                                                    | Yes                          |
| Definite or Probable Stent Thrombosis | 68                      | 47                               | 68 (100%)                                                     | Yes                          |

The model was considered to provide an adequate fit to the data if (i) the mean of the residual deviance was similar to the number of data points used in the model, (ii) at least 95% of means of standardized nodebased residuals were within  $\pm 1.96$  of the standard normal distribution, and (iii) Q-Q plots of residuals lied closely around a line on visual inspection. SND, Standard Normal Distribution

**Appendix Table H.** Evaluation of model fit: Model restricted to trials with clopidogrel duration >6 months

| <b>Outcome</b>                        | <b>N of Data Points</b> | <b>Mean of residual deviance</b> | <b>N (%) of residuals within <math>\pm 1.96</math> of SND</b> | <b>Satisfactory Q-Q plot</b> |
|---------------------------------------|-------------------------|----------------------------------|---------------------------------------------------------------|------------------------------|
| Target Vessel Revascularization       | 64                      | 73                               | 64 (100%)                                                     | Yes                          |
| Target Lesion Revascularization       | 64                      | 72                               | 64 (100%)                                                     | Yes                          |
| Death                                 | 62                      | 58                               | 61 (98.4%)                                                    | Yes                          |
| Myocardial Infarction                 | 62                      | 64                               | 62 (100%)                                                     | Yes                          |
| Any Stent Thrombosis                  | 56                      | 52                               | 55 (98.2%)                                                    | Yes                          |
| Definite Stent Thrombosis             | 54                      | 40                               | 53 (98.2%)                                                    | Yes                          |
| Definite or Probable Stent Thrombosis | 62                      | 47                               | 62 (100%)                                                     | Yes                          |

The model was considered to provide an adequate fit to the data if (i) the mean of the residual deviance was similar to the number of data points used in the model, (ii) at least 95% of means of standardized nodebased residuals were within  $\pm 1.96$  of the standard normal distribution, and (iii) Q-Q plots of residuals lied closely around a line on visual inspection. SND, Standard Normal Distribution
